# Supplementary material
Source: PubMed Central journal article supplement (PMC3722614)
Supplement: nn4019619_si_003.pdf [file nn4019619_si_003.pdf]

## SUPPORTING INFORMATION

### Quantification of Nanoparticle Dose and Vesicular Inheritance in Proliferating Cells

*Huw D. Summers\*<sup>1</sup>, Martyn. R. Brown<sup>1</sup>, Mark D. Holton<sup>1</sup>, James A. Tonkin<sup>1</sup>, Nicole Hondow<sup>2</sup>, Andrew P. Brown<sup>2</sup>, Rik Brydson<sup>2</sup> and Paul Rees<sup>1</sup>*

<sup>1</sup>Centre for Nanohealth, College of Engineering, Swansea University, Singleton Park, Swansea, SA2 8PP, U.K.

<sup>2</sup>Institute for Materials Research, School of Process, Environmental and Materials Engineering, University of Leeds, Leeds, LS2 9JT, U.K.

Modelled profile of interaction volume

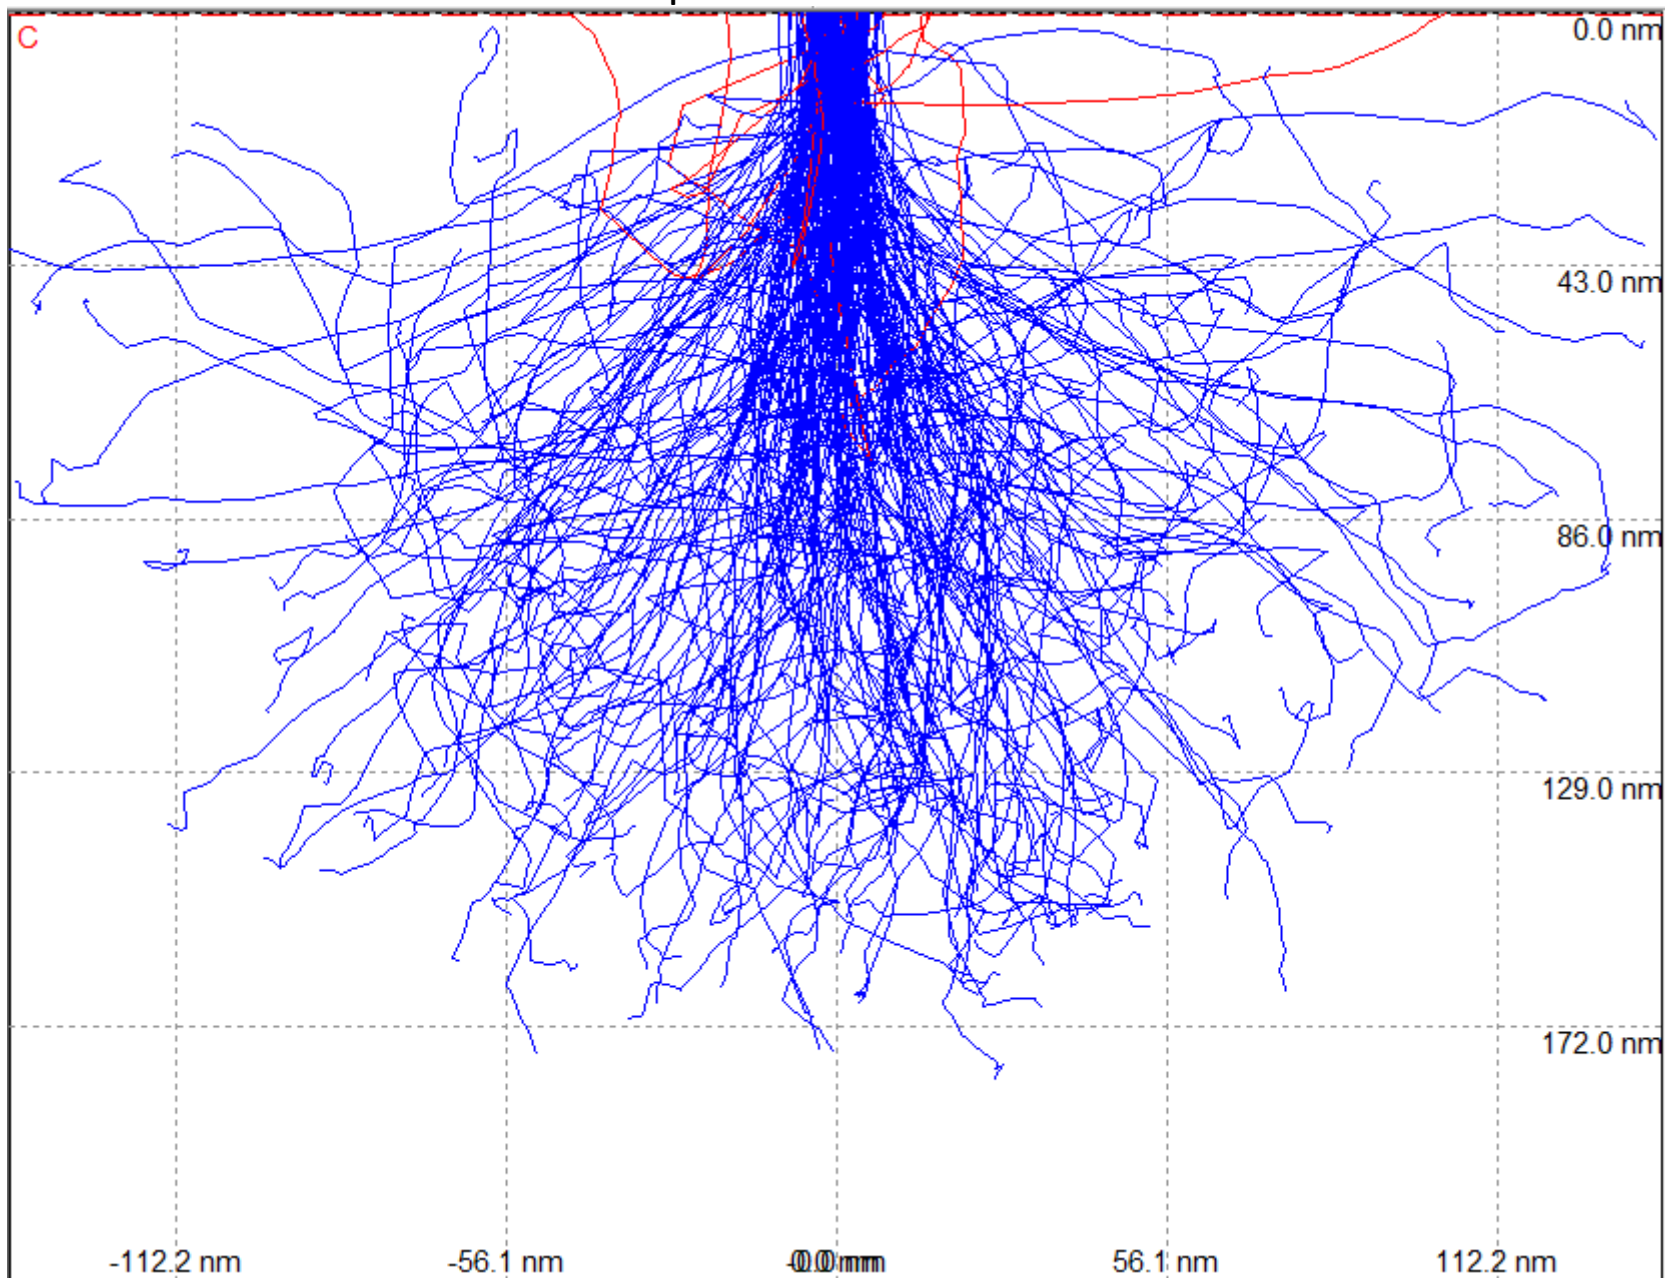

# Histogram of electron penetration depth

Z Max Backscattered

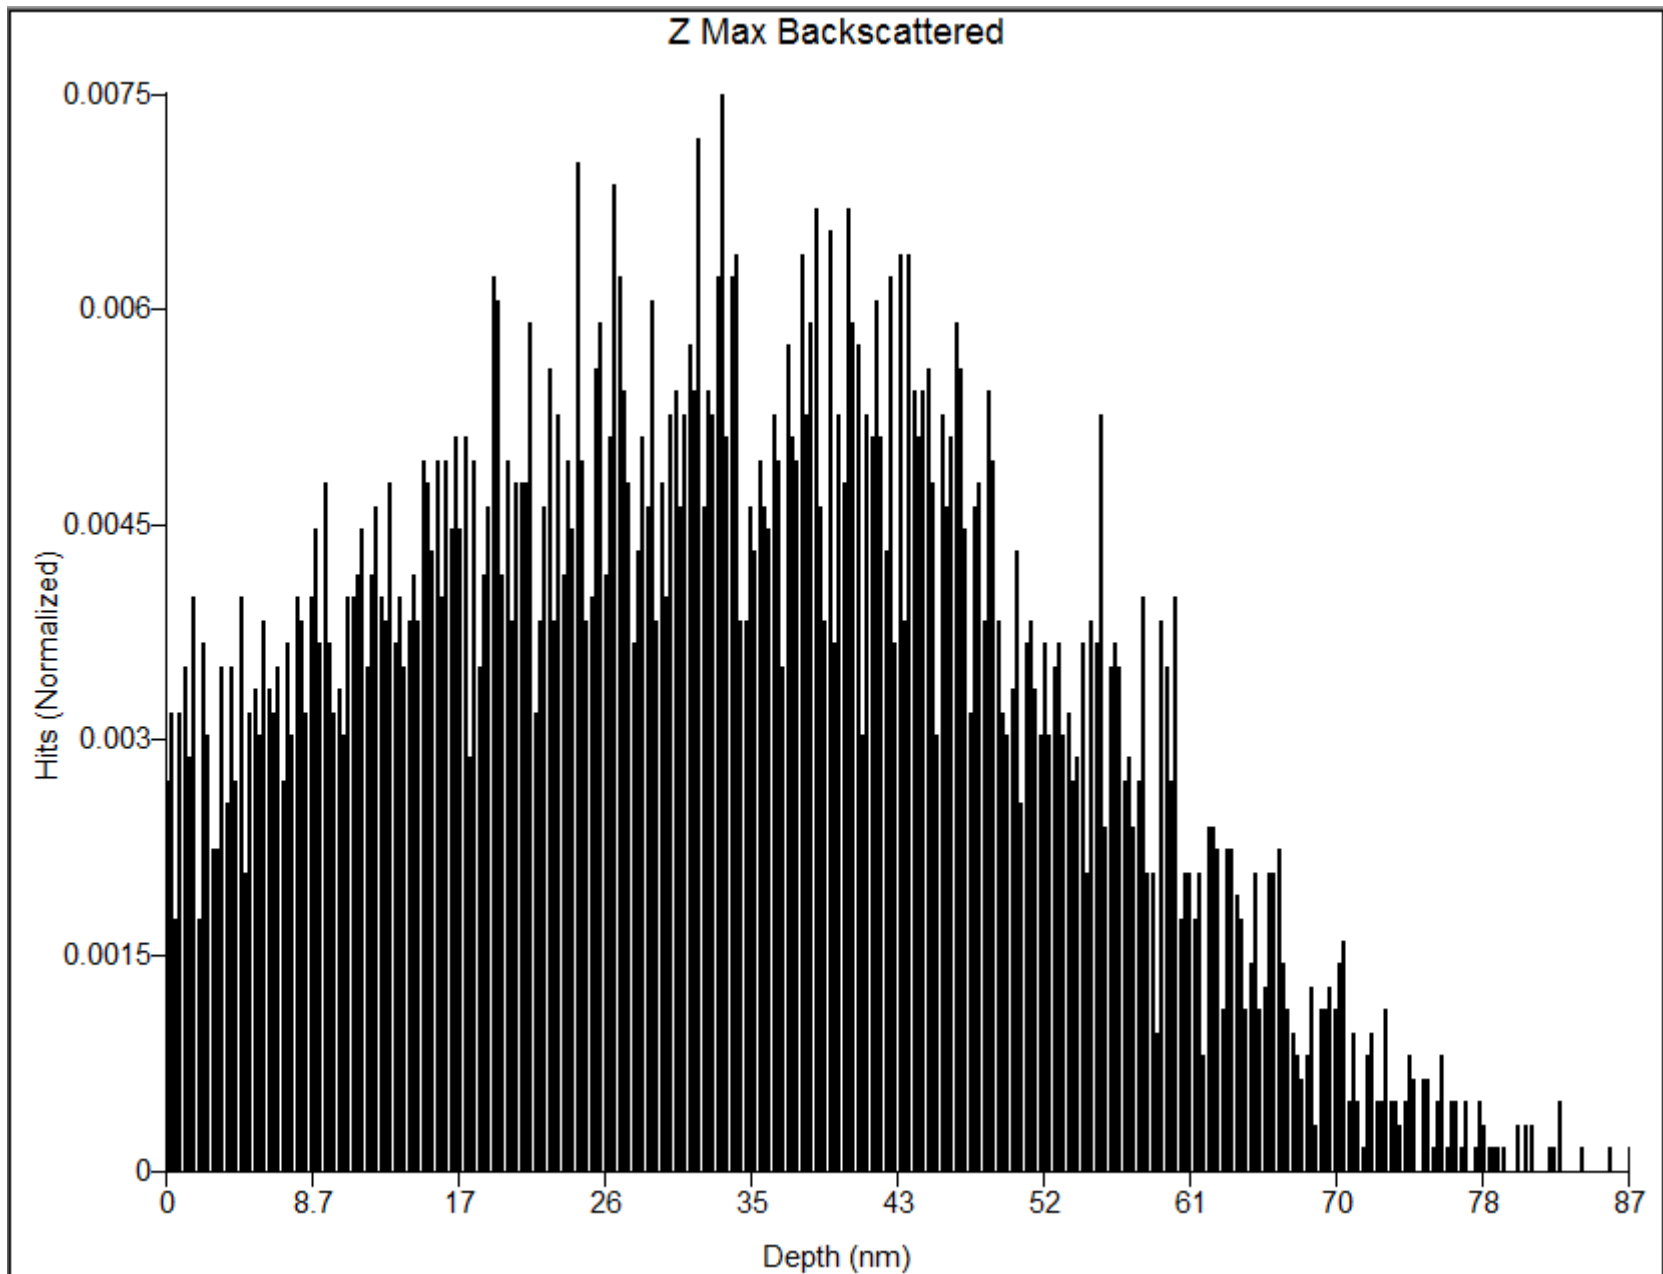

Backscattering Coefficient: 0.062750 | Elapsed Time: 00:00:22 | Time Remaining: 00:00:00 | Progress: 100.0% | Stopped
