# Supplementary material
Source: PubMed Central journal article supplement (PMC3722614)

## SUPPORTING INFORMATION

### **Quantification of Nanoparticle Dose and Vesicular Inheritance in Proliferating Cells**

*Huw D. Summers<sup>\*1</sup>, Martyn. R. Brown<sup>1</sup>, Mark D. Holton<sup>1</sup>, James A. Tonkin<sup>1</sup>, Nicole Hondow<sup>2</sup>, Andrew P. Brown<sup>2</sup>, Rik Brydson<sup>2</sup> and Paul Rees<sup>1</sup>*

<sup>1</sup>Centre for Nanohealth, College of Engineering, Swansea University, Singleton Park, Swansea, SA2 8PP, U.K.

<sup>2</sup>Institute for Materials Research, School of Process, Environmental and Materials Engineering, University of Leeds, Leeds, LS2 9JT, U.K.

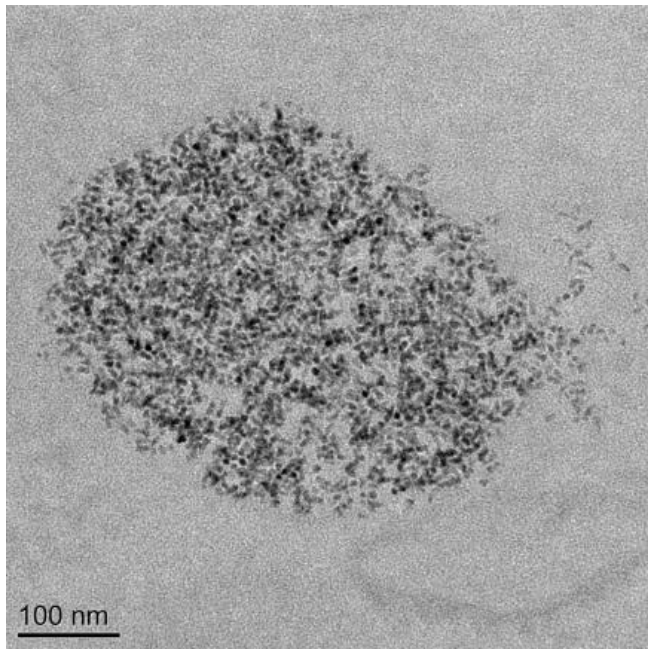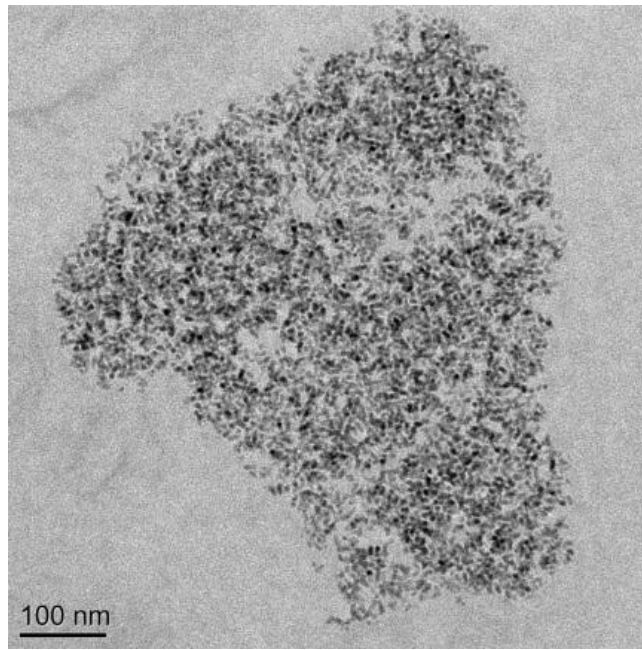

Enlarged versions of the single vesicle TEM images shown in figure 2A of the main manuscript

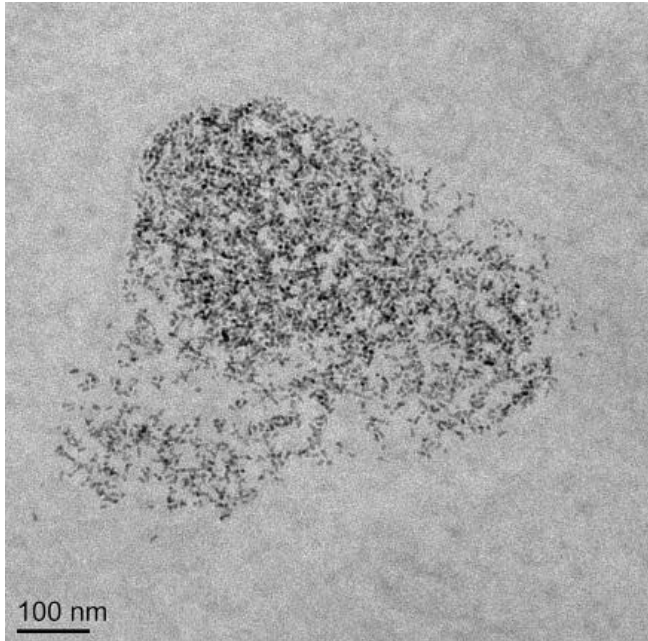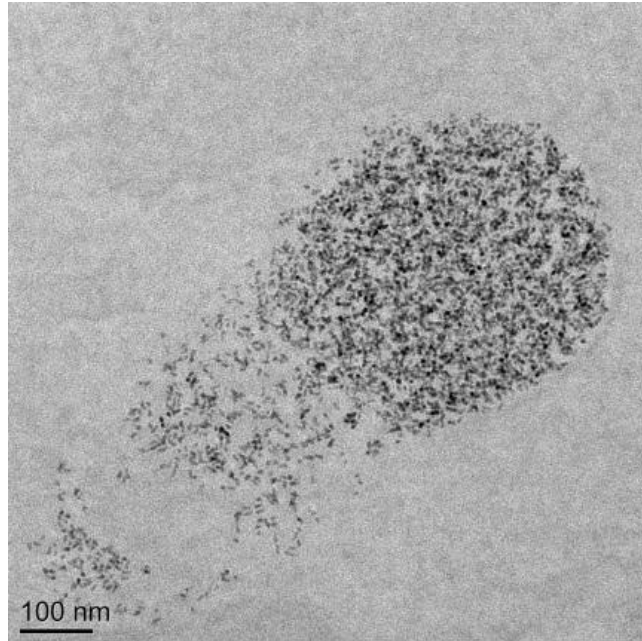

Supplement: nn4019619_si_004.pdf [file nn4019619_si_004.pdf]
